# Supplementary material
Source: Springer Nature journal article supplement (https://www.springermedizin.de/resource/supplementary/12936_2014_3588_MOESM6_ESM.pdf/9545980)

$(IA, BMS, BMD, G)_{Entering}$

$K = 50\%, T = 25^\circ C$

(a)

$(IA, BMS, BMD, G)_{Resting}$

$K = 50\%, T = 25^\circ C$

(b)

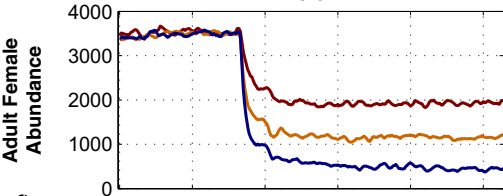

(c)

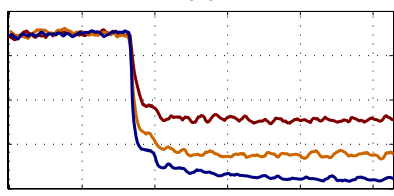

(d)

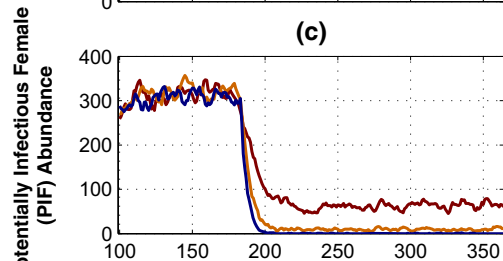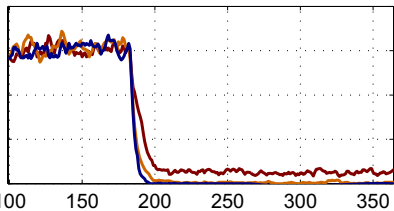

Time (Day)

— C = 25% — C = 50% — C = 75%

Supplement: MOESM6 [file 9545980]
